# Supplementary material for: Ultrasensitive detection of gastric cancer biomarkers via a frequency shift-based SERS microfluidic chip
Source: Royal Society of Chemistry journal article supplement (doi:10.1039/d3an00535f), 2023-01-01
Supplement: d3an00535f1.pdf [file d3an00535f1.pdf]

# **Ultrasensitive detection of gastric cancer biomarkers via frequency shift-based SERS microfluidic chip**

Yong Huang<sup>a†</sup>, Zhengqing Liu<sup>b†</sup>, Xiaogang Qin<sup>c</sup>, Jia Liu<sup>d</sup>, Yan Yang<sup>a</sup>, Wei Wei<sup>a\*</sup>

<sup>a</sup>Department of General Surgery, Jiangdu People's Hospital Affiliated to Yangzhou University, Yangzhou, China

<sup>b</sup>Department of Endocrinology, SuzhouNinth People's Hospital, Suzhou, China

<sup>c</sup>Department of gastroenterology, Traditional Chinese Medicine Hospital of Tongzhou District, Nantong, China

<sup>d</sup>Department of Gastroenterology, Jiangdu People's Hospital Affiliated to Yangzhou University, Yangzhou, China

<sup>†</sup>These two authors contributed to this manuscript equally.

\*Corresponding author Wei Wei: 18952531159@yzu.edu.cn

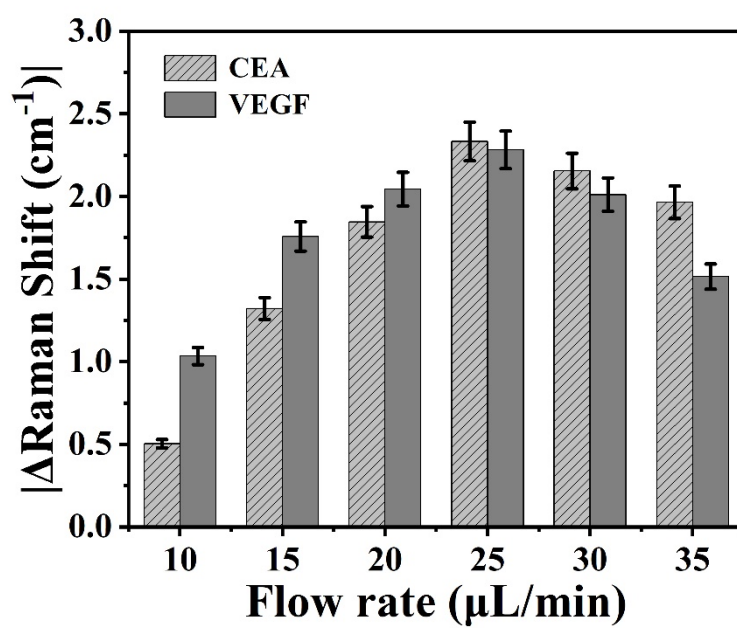

Fig. S1 Response of SERS platform to the flow rate.

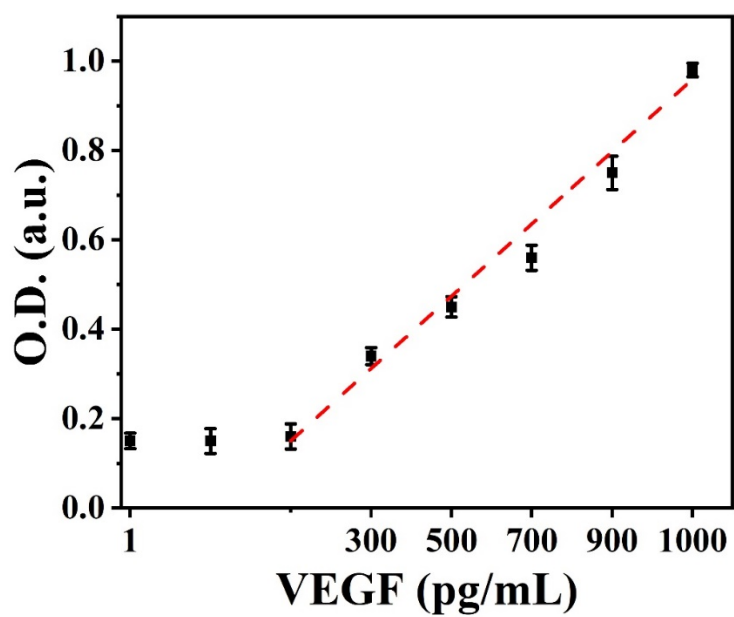

Fig. S1 OD calibration curve for VEGF concentrations based on ELISA.

**Table S1** Results of the SERS and ELISA for healthy subjects

| Sample | CEA (ng/mL) |       |                    | VEGF (pg/mL) |        |                    |
|--------|-------------|-------|--------------------|--------------|--------|--------------------|
|        | SERS        | ELISA | Relative error (%) | SERS         | ELISA  | Relative error (%) |
| 1      | 3.22        | 3.52  | -9.32              | 156.05       | 166.12 | -6.45              |
| 2      | 3.38        | 3.24  | 4.14               | 164.31       | 153.26 | 6.73               |
| 3      | 3.02        | 3.36  | -11.26             | 121.25       | 131.75 | -8.66              |
| 4      | 3.95        | 3.79  | 4.05               | 133.08       | 121.47 | 8.72               |
| 5      | 3.52        | 3.82  | -8.52              | 144.11       | 149.96 | -4.06              |
| 6      | 4.03        | 4.41  | -9.43              | 144.66       | 137.17 | 5.18               |
| 7      | 2.77        | 2.66  | 3.97               | 145.6        | 157.96 | -8.49              |
| 8      | 3.32        | 3.64  | -9.64              | 123.31       | 132.82 | -7.71              |
| 9      | 4.02        | 4.31  | -7.21              | 156.05       | 146.28 | 6.26               |
| 10     | 2.23        | 2.41  | -8.07              | 154.8        | 139.37 | 9.97               |
| 11     | 2.35        | 2.58  | -9.79              | 158.99       | 146.42 | 7.91               |
| 12     | 4.13        | 3.95  | 4.36               | 150.66       | 140.61 | 6.67               |
| 13     | 3.91        | 3.64  | 6.91               | 161.2        | 150.69 | 6.52               |
| 14     | 3.63        | 3.87  | -6.61              | 141.43       | 131.38 | 7.11               |
| 15     | 3.21        | 3.44  | -7.17              | 145.09       | 133.73 | 7.83               |
| 16     | 1.26        | 1.35  | -7.14              | 140.8        | 132.66 | 5.78               |
| 17     | 1.47        | 1.41  | 4.08               | 158.3        | 145.7  | 7.96               |
| 18     | 1.81        | 1.92  | -6.08              | 143.87       | 133.55 | 7.17               |
| 19     | 2.41        | 2.59  | -7.47              | 55.15        | 50.88  | 7.74               |
| 20     | 2.83        | 2.68  | 5.30               | 132.18       | 139.52 | -5.55              |
| 21     | 4.18        | 4.51  | -7.89              | 159.77       | 169.87 | -6.32              |
| 22     | 3.99        | 4.32  | -8.27              | 57.69        | 53.63  | 7.04               |
| 23     | 1.06        | 1.15  | -8.49              | 143.87       | 136.29 | 5.27               |
| 24     | 1.93        | 2.07  | -7.25              | 136.91       | 127.01 | 7.23               |
| 25     | 3.08        | 3.38  | -9.74              | 157.92       | 150.82 | 4.50               |
| 26     | 4.18        | 4.05  | 3.11               | 161.43       | 149.33 | 7.50               |
| 27     | 1.18        | 1.26  | -6.78              | 159.77       | 150.36 | 5.89               |
| 28     | 4.31        | 4.13  | 4.18               | 159.77       | 149.58 | 6.38               |
| 29     | 3.37        | 3.69  | -9.50              | 56.28        | 51.46  | 8.56               |
| 30     | 4.08        | 4.46  | -9.31              | 161.8        | 152.62 | 5.67               |

**Table S2** Results of the SERS and ELISA for GC patients

| Sample | CEA (ng/mL) |       |                    | VEGF (ng/mL) |       |                    |
|--------|-------------|-------|--------------------|--------------|-------|--------------------|
|        | SERS        | ELISA | Relative error (%) | SERS         | ELISA | Relative error (%) |
| 1      | 27.91       | 25.58 | 8.35               | 2.54         | 2.37  | 6.69               |
| 2      | 13.15       | 12.21 | 7.15               | 2.56         | 2.38  | 7.03               |
| 3      | 26.05       | 24.48 | 6.03               | 2.47         | 2.28  | 7.69               |
| 4      | 16.15       | 15.07 | 6.69               | 2.53         | 2.32  | 8.30               |
| 5      | 17.64       | 18.36 | -4.08              | 2.61         | 2.41  | 7.66               |
| 6      | 16.52       | 15.45 | 6.48               | 2.52         | 2.3   | 8.73               |
| 7      | 21.46       | 19.83 | 7.60               | 1.95         | 1.78  | 8.72               |
| 8      | 20.66       | 19.24 | 6.87               | 2.45         | 2.27  | 7.35               |
| 9      | 25.92       | 23.63 | 8.83               | 2.38         | 2.19  | 7.98               |
| 10     | 11.15       | 11.72 | -5.11              | 1.74         | 1.89  | -8.62              |
| 11     | 18.2        | 17.07 | 6.21               | 1.82         | 1.69  | 7.14               |
| 12     | 15.68       | 14.74 | 5.99               | 2.37         | 2.19  | 7.59               |
| 13     | 26.17       | 24.15 | 7.72               | 2.33         | 2.21  | 5.15               |
| 14     | 22.95       | 21.37 | 6.88               | 1.81         | 1.69  | 6.63               |
| 15     | 16.65       | 15.41 | 7.45               | 2.42         | 2.27  | 6.20               |
| 16     | 20.03       | 18.04 | 9.94               | 2.37         | 2.22  | 6.33               |
| 17     | 12.72       | 11.94 | 6.13               | 2.53         | 2.32  | 8.30               |
| 18     | 26.57       | 25.04 | 5.76               | 2.66         | 2.43  | 8.65               |
| 19     | 12.23       | 11.15 | 8.83               | 2.59         | 2.41  | 6.95               |
| 20     | 21.39       | 20.06 | 6.22               | 2.49         | 2.29  | 8.03               |
| 21     | 20.49       | 19.1  | 6.78               | 2.29         | 2.11  | 7.86               |
| 22     | 11.53       | 10.92 | 5.29               | 2.52         | 2.37  | 5.95               |
| 23     | 20.59       | 19.26 | 6.46               | 2.67         | 2.51  | 5.99               |
| 24     | 19.39       | 17.86 | 7.89               | 2.55         | 2.39  | 6.27               |
| 25     | 11.93       | 11.08 | 7.12               | 2.57         | 2.43  | 5.45               |
| 26     | 11.5        | 12.22 | -6.26              | 2.43         | 2.25  | 7.41               |
| 27     | 16.32       | 15.15 | 7.17               | 2.51         | 2.35  | 6.37               |
| 28     | 11.23       | 10.35 | 7.84               | 2.61         | 2.47  | 5.36               |
| 29     | 16.04       | 16.72 | -4.24              | 1.92         | 1.78  | 7.29               |
| 30     | 23.82       | 22.21 | 6.76               | 2.41         | 2.22  | 7.88               |
